# Supplementary material for: Genome-Wide Identification, Expression Analysis, and Potential Roles under Abiotic Stress of the YUCCA Gene Family in Mungbean (Vigna radiata L.)
Source: MDPI journal article supplement (doi:10.3390/ijms24021603), 2023-01-13
Supplement: s1 [file s1]

Table S2. All primers used in this study

| Purpose                         | Name of primers | Sequences (5'-3')                |
|---------------------------------|-----------------|----------------------------------|
| For RT-PCR and<br>Real-time PCR | VrActin-3-F     | CAGTGTCTGGATTGGAGGCT             |
|                                 | VrActin-3-R     | GTCCTCGACCACTTGATG               |
|                                 | VrYUC2a-RTF     | GGGAGTGACATGTTCAAGTGAAGAAAGATG   |
|                                 | VrYUC2a-RTR     | TCATGCAAGTGGACAAGGAAACTCC        |
|                                 | VrYUC2b-RTF2    | TGGTTGAAGGGGAGTGAGATGTTTTG       |
|                                 | VrYUC2b-RTR2    | TTACGTGGTCTTAGCAGCTTTCCAGC       |
|                                 | VrYUC3-RTF2     | CAAACGATGGAACTCCAAGAAACCC        |
|                                 | VrYUC3-RTR2     | TTAGAAGTGTGATATGCACCTCCTGTGAC    |
|                                 | VrYUC4a-RTF2    | ATGGAGTCTTGCAAGGGACCAGAG         |
|                                 | VrYUC4a-RTR2    | GGAAATGGTGAGGGAAGGGCAT           |
|                                 | VrYUC4b-RTF1    | GGAACACAGTGCATGTCCTTCCTAGG       |
|                                 | VrYUC4b-RTR1    | CTCCTTCACACCTTCCATCACCTTTATG     |
|                                 | VrYUC6a-RTF     | CAAGGCATCGTCTTCTTCAACGGT         |
|                                 | VrYUC6a-RTR     | TGGGGAAGTGAGAAGGGAAGGG           |
|                                 | VrYUC6b-RTF     | ATGCATTCTTGGATGGACTATTGCTTG      |
|                                 | VrYUC6b-RTR     | CGCTCTAGGATTAGGCTTGGAAGTCC       |
|                                 | VrYUC8a-RTF2    | CTCAAAGAATGGATTCCCGAAGATG        |
|                                 | VrYUC8a-RTR2    | TTAGAACTGAGAAATGCATCTTCTATGACATG |

|                            |               |                                                          |
|----------------------------|---------------|----------------------------------------------------------|
|                            | VrYUC8b-RTF   | TTCGCTTAGTTGATTGTGAGGAAACG                               |
|                            | VrYUC8b-RTR   | AAGTGTGGTGGGAATGGAAGGTTG                                 |
|                            | VrYUC8c-RTF2  | ATGGAAAACCTATTTTCGCCTAGTTAATTGTGA                        |
|                            | VrYUC8c-RTR2  | AGATGGAGTTTTTAATCTGTCGTAGGTTTCGT                         |
|                            | VrYUC10-RTF2  | GAGATCAACCAACAAGTGGCTCAAGG                               |
|                            | VrYUC10-RTR2  | TCAGGGTTGTTGCATGAAGAAGCTTATAT                            |
|                            | VrYUC11-RTF   | CAACAGTAATGGAATGCCTAAACCAGG                              |
|                            | VrYUC11-RTR   | TTATTTCTGAATGAGTTTGAGGGAAGCTAAG                          |
|                            | AtActin2-F    | TCCTTTGTTGCTGTTGACTACG                                   |
|                            | AtActin2-R    | ATTTTCTGTGAACGATTCCTGG                                   |
| For prokaryotic expression | pMALVrYUC2a-F | <u>TTCAGAATTCGGATCC</u> ATGGACTACTTGAAGGAACTAGAAGGAAAAAG |
|                            | pMALVrYUC2a-R | <u>GCAGGTCGACTCTAGAT</u> CATGCAAGTGGACAAGGAAACTCC        |
|                            | pMALVrYUC2b-F | <u>TTCAGAATTCGGATCC</u> ATGGTTTTGATGGAGTACTTGAAGGAGG     |
|                            | pMALVrYUC2b-R | <u>GCAGGTCGACTCTAGATT</u> ACGTGGTCTTAGCAGCTTTCCAGC       |
|                            | pMALVrYUC3-F  | <u>TTCAGAATTCGGATCC</u> ATGCATGACATTTGTCTCAACATGCC       |
|                            | pMALVrYUC3-R  | <u>GCAGGTCGACTCTAGATT</u> AGAAGTGTGATATGCACCTCCTGTGAC    |
|                            | pMALVrYUC4a-F | <u>TTCAGAATTCGGATCC</u> ATGGAGTCTTGCAAGGGACCAGAG         |
|                            | pMALVrYUC4a-R | <u>GCAGGTCGACTCTAGACT</u> ATGTACTCTTGAGCAAGATCATGTGGG    |
|                            | pMALVrYUC4b-F | <u>TTCAGAATTCGGATCC</u> ATGGGTTCTTGCAAACCCCAACA          |
|                            | pMALVrYUC4b-R | <u>GCAGGTCGACTCTAGATT</u> ATGAAGTGAGAAGGATGATATGTGAATTGC |

---

|               |                                                           |
|---------------|-----------------------------------------------------------|
| pMALVrYUC6a-F | <u>TTCAGAATTCGGATCC</u> ATGGACTATTGCATAAGAGAAATAGAGGGAA   |
| pMALVrYUC6a-R | GCAGGTCGACTCTAG <u>ACT</u> ATGAATTTGGTTGCGGCAAGTG         |
| pMALVrYUC6b-F | <u>TTCAGAATTCGGATCC</u> ATGCATTCTTGGATGGACTATTGCTTG       |
| pMALVrYUC6b-R | GCAGGTCGACTCTAG <u>AT</u> CATGAATTTGATTGTGGAACATTAAATGAG  |
| pMALVrYUC8a-F | <u>TTCAGAATTCGGATCC</u> ATGGAGAACTTTTTTCGCCTAGTGGAC       |
| pMALVrYUC8a-R | GCAGGTCGACTCTAG <u>ATT</u> AGAACTGAGAAATGCATCTTCTATGACATG |
| pMALVrYUC8b-F | <u>TTCAGAATTCGGATCC</u> ATGGAAAACTTTTTCGCTTAGTTGATTG      |
| pMALVrYUC8b-R | GCAGGTCGACTCTAG <u>AT</u> CAGAACTGAGAAATGCAACGTCTATGAG    |
| pMALVrYUC8c-F | <u>TTCAGAATTCGGATCC</u> ATGGAAAAC TTATTTGCCTAGTTAATTGTGA  |
| pMALVrYUC8c-R | GCAGGTCGACTCTAG <u>AT</u> CAGAACTGAGAAATGCAACGTCTATGAG    |
| pMALVrYUC10-F | <u>TTCAGAATTCGGATCC</u> ATGCAGGAGGAAGATAAGGCCGAG          |
| pMALVrYUC10-R | GCAGGTCGACTCTAG <u>AT</u> CAGGGTTGTTGCATGAAGAAGCTTATAT    |
| pMALVrYUC11-F | <u>TTCAGAATTCGGATCC</u> ATGGAGATTGAAGTTCCTGTTGTGATTG      |
| pMALVrYUC11-R | GCAGGTCGACTCTAG <u>ATT</u> ATTTCTGAATGAGTTTGAGGGAAGCTAAG  |

---
