# Supplementary material for: Genome-Wide Identification, Expression Analysis, and Potential Roles under Abiotic Stress of the YUCCA Gene Family in Mungbean (Vigna radiata L.)
Source: MDPI journal article supplement (doi:10.3390/ijms24021603), 2023-01-13
Supplement: s1 [file s1]

Table S1. The information of *VrYUCCA* genes in mungbean

| Name             | Gene <sup>a</sup>    | NCBI           | Locus ID            | Location                                    | length (aa) | pI   | M.W.  | Predicted cell localizations |
|------------------|----------------------|----------------|---------------------|---------------------------------------------|-------------|------|-------|------------------------------|
| <i>VrYUCCA2a</i> | <i>Vradi01g04110</i> | XP_014508305.1 | <i>LOC106767860</i> | Chr01 (6395222..6398559, complement)        | 425         | 9.03 | 47.57 | Cytoplasm                    |
| <i>VrYUCCA2b</i> | <i>Vradi07g28320</i> | XP_014508261.1 | <i>LOC106767822</i> | Chr07 (52005775..52008781)                  | 416         | 9.00 | 46.39 | Cytoplasm                    |
| <i>VrYUCCA3</i>  | <i>Vradi08g03860</i> | XP_014511461.1 | <i>LOC106770152</i> | Chr08 (6711112..6714058)                    | 434         | 9.12 | 48.40 | Cytoplasm                    |
| <i>VrYUCCA4a</i> | <i>Vradi05g09830</i> | XP_014500804.1 | <i>LOC106761746</i> | Chr05 (18116316..18118574, complement)      | 408         | 9.54 | 45.61 | Cytoplasm                    |
| <i>VrYUCCA4b</i> | <i>Vradi06g12650</i> | XP_014504238.1 | <i>LOC106764471</i> | Chr06 (30511543..30514503, complement)      | 401         | 9.05 | 44.80 | Cytoplasm                    |
| <i>VrYUCCA6a</i> | <i>Vradi05g09130</i> | XP_014500302.1 | <i>LOC106761281</i> | Chr05 (17097676..17101207, complement)      | 427         | 7.96 | 48.04 | Cytoplasm                    |
| <i>VrYUCCA6b</i> | <i>Vradi06g10150</i> | XP_014504106.1 | <i>LOC106764337</i> | Chr06 (22339334..22343602, complement)      | 440         | 9.29 | 49.89 | Chloroplast                  |
| <i>VrYUCCA8a</i> | <i>Vradi03g02780</i> | XP_014495524.1 | <i>LOC106757377</i> | Chr03 (3873022..3875211)                    | 423         | 8.79 | 47.52 | Cytoplasm                    |
| <i>VrYUCCA8b</i> | <i>Vradi08g08480</i> | XP_014513031.1 | <i>LOC106771549</i> | Chr08 (23774301..23776285)                  | 423         | 8.85 | 47.73 | Nucleus                      |
| <i>VrYUCCA8c</i> | <i>Vradi08g08490</i> | XP_014512724.1 | <i>LOC106771284</i> | Chr08 (23808239..23810294)                  | 424         | 8.85 | 47.86 | Nucleus                      |
| <i>VrYUCCA10</i> | Not find             | XP_014495430.1 | <i>LOC106757305</i> | Chr03 (7146301..7149975, complement)        | 385         | 8.50 | 43.14 | Cytoplasm                    |
| <i>VrYUCCA11</i> | Not find             | XP_014522304.1 | <i>LOC106778822</i> | NW_014541999.1 (311357..313142, complement) | 399         | 8.76 | 44.64 | Cytoplasm                    |

Note: pI, isoelectric point; M.W. molecular weight. a, these Gene IDs were taken mung bean database ([http://plantgenomics.snu.ac.kr/mediawiki-1.21.3/index.php/Main\\_Page](http://plantgenomics.snu.ac.kr/mediawiki-1.21.3/index.php/Main_Page)) released in 2014 as the reference.
