# Supplementary material for: Genome-Wide Identification, Expression Analysis, and Potential Roles under Abiotic Stress of the YUCCA Gene Family in Mungbean (Vigna radiata L.)
Source: Int J Mol Sci. 2023 Jan 13;24(2):1603. doi: 10.3390/ijms24021603 (PMC9866024; doi:10.3390/ijms24021603)
Supplement: Supplementary file 1 [file ijms-24-01603-s001.zip]

Archive with 4 entries (4 files):
- supplement figures.pdf
- supplementary data S1- sequence information.pdf
- Table S1 VrYUCCA Genes information.pdf
- Table S2 Primers.pdf
